# Supplementary material for: Barriers in accessing HIV care for Francophone African, Caribbean and Black people living with HIV in Canada: a scoping review
Source: PubMed Central journal article supplement — BMJ Open. 2020 Aug 27;10(8):e036885. doi: 10.1136/bmjopen-2020-036885 (PMC7454192; doi:10.1136/bmjopen-2020-036885), 2020-08-27
Supplement: bmjopen-2020-036885supp001.pdf [file bmjopen-2020-036885supp001.pdf]

## Search strategy for MEDLINE

Database: MEDLINE

Search strategy:

1. exp "Emigrants and Immigrants"/
2. immigrant\*.mp.
3. Emigrant\*.mp.
4. migrant\*.mp.
5. (landed adj5 status).tw.
6. (landed adj5 person\*).tw.
7. (landed adj5 resident\*).tw.
8. exp Refugees/
9. asylum.tw.
10. new Canadian.tw.
11. resident.tw.
12. refugee.tw.
13. \*POPULATION/
14. communit\*.tw.
15. exp MINORITY GROUPS/
16. MINORITY HEALTH/
17. minorit\*.tw.
18. exp patient/ or patient.tw.
19. 1 or 2 or 3 or 4 or 5 or 6 or 7 or 8 or 9 or 10 or 11 or 12 or 13 or 14 or 15 or 16 or 17
20. french.tw.
21. francophone\*.tw.
22. Francophonie.mp.
23. exp Language/
24. (french or francais or franco\* or quebec\*).tw.
25. 23 and 24
26. ((french or francais or franco\*) adj5 language).tw.
27. 20 or 21 or 22 or 25 or 26
28. exp African Continental Ancestry Group/
29. (Africa\* or African or Afrique or Africain\*).tw.
30. Benin.tw.
31. Burkina Fas\*.tw.
32. Burundi.tw.
33. Cameroon.tw.
34. "Central African Republic".tw.
35. Centrafrique.tw.
36. centrafricain\*.tw.
37. Caribbean.mp. or exp Caribbean Region/
38. exp CHAD/
39. (Congo or congol\*).tw.
40. Brazzaville.tw.
41. Kinshasa.tw.
42. Djibouti.tw.

43. Guinea.tw.
44. French africa.tw.
45. Gabon\*.tw.
46. Haiti\*.tw.
47. (Ivory Coast or Ivoire or Ivorian).tw.
48. Madagascar.tw.
49. Mali.tw.
50. Morroc\*.tw.
51. Niger.tw.
52. Rwanda\*.tw.
53. (St? Martin or saint Martin).tw.
54. Senegal\*.tw.
55. Togo.tw.
56. Black-White.tw.
57. Black.ti,ab.
58. "black canadian".tw.
59. mixed race.tw.
60. 27 or 28 or 29 or 30 or 31 or 32 or 33 or 34 or 35 or 36 or 37 or 38 or 39 or 40 or 41 or 42 or 43 or 44 or 45 or 46 or 47 or 48 or 49 or 50 or 51 or 52 or 53 or 54 or 55 or 56 or 58 or 59
61. 19 and 60
62. canada/
63. (Canada or Canad\*).tw.
64. (canada or canadian\$ or alberta or british columbia or columbie britannique).tw.
65. (saskatchewan or manitoba or ontario or quebec or new brunswick or nouveau brunswick).tw.
66. (nova scotia or nouvelle ecosse or prince edward island or ile du prince edward or newfoundland or terre neuve or labrador or nun?v?t or nun?v?t or nwt or territoires du nord ouest or northwest territories or yukon).tw.
67. OHIP.tw.
68. "health canada".tw.
69. "sante canada".tw.
70. medicare.tw.
71. CIHR.tw.
72. ("Alberta Health Care Insurance Plan" or AHCIP).tw.
73. ("Medical Services Plan" or MSP).tw.
74. Manitoba health.tw.
75. ("Vitalite Health Network" or "Horizon Health Network").tw.
76. "Department of Health and Community Services".tw.
77. "Health Care Card".tw.
78. ("Nova scotia health card" or MSI).tw.
79. Nunavut Health Insurance Card.tw.
80. ("Carte d'assurance maladie" or "Health Insurance Card" or "RAMQ").tw.
81. (health card adj25 canada).tw.
82. 62 or 63 or 64 or 65 or 66 or 67 or 68 or 69 or 70 or 71 or 72 or 73 or 74 or 75 or 76 or 77 or 78 or 79 or 80 or 81

83. 61 and 82
84. exp "Delivery of Health Care"/
85. proximity.ti,ab.
86. "healthcare or health care".tw.
87. exp Health Care Quality, Access/ and Evaluation/
88. Quality of care/
89. Health Promotion/
90. Primary Health Care/
91. Patient Acceptance of Health Care/
92. Healthcare Disparities/
93. exp racism/
94. multilingualism/
95. Needs Assessment/
96. exp Culturally Competent Care/
97. Health Services Accessibility/
98. exp Physicians, Family/
99. quality indicators/
100. Patient Medication Knowledge/
101. Patient Navigation/
102. Patient Compliance/
103. exp patient satisfaction/
104. exp HIV/
105. Preventive Medicine/
106. HIV.mp.
107. exp HIV infections/
108. seropositivity/
109. seroconversion/
110. Quality of Life/
111. (HRQOL or karnofsky).tw.
112. 84 or 86 or 87 or 90 or 91 or 92 or 95 or 96 or 97 or 98 or 100 or 101 or 102 or 104 or 106
113. 19 and 27 and 60 and 83 and 112
