# Supplementary material for: Barriers in accessing HIV care for Francophone African, Caribbean and Black people living with HIV in Canada: a scoping review
Source: PubMed Central journal article supplement — BMJ Open. 2020 Aug 27;10(8):e036885. doi: 10.1136/bmjopen-2020-036885 (PMC7454192; doi:10.1136/bmjopen-2020-036885), 2020-08-27
Supplement: bmjopen-2020-036885supp002.pdf [file bmjopen-2020-036885supp002.pdf]

## Appendix 1: Characteristics of excluded studies

| Reason for exclusion       | Study reference (n=41)                                                                                                                                                                                                                                                                                                                                                                                                                                                                                                                                                                                                                                                                                                                                                                                                                                                                                                                                                                                                                                                                                                                                                                                                                                                                                                                                                                                                                                                                                                                                                                                                                                                                                                                                                                                                                                                                                                                                                                                                                                                                                                                                                                                                                                                                                                                                                                                                                                                                                                                                                                                                                                                                                                                                                                                                                                                                                                                                                                                                                                                                                                                                                                                                                                                                                                                                                                                                                                                                                                                                                                                                                                                                                                                                                                                                                                                                                                                                                                                                                                                       |
|----------------------------|------------------------------------------------------------------------------------------------------------------------------------------------------------------------------------------------------------------------------------------------------------------------------------------------------------------------------------------------------------------------------------------------------------------------------------------------------------------------------------------------------------------------------------------------------------------------------------------------------------------------------------------------------------------------------------------------------------------------------------------------------------------------------------------------------------------------------------------------------------------------------------------------------------------------------------------------------------------------------------------------------------------------------------------------------------------------------------------------------------------------------------------------------------------------------------------------------------------------------------------------------------------------------------------------------------------------------------------------------------------------------------------------------------------------------------------------------------------------------------------------------------------------------------------------------------------------------------------------------------------------------------------------------------------------------------------------------------------------------------------------------------------------------------------------------------------------------------------------------------------------------------------------------------------------------------------------------------------------------------------------------------------------------------------------------------------------------------------------------------------------------------------------------------------------------------------------------------------------------------------------------------------------------------------------------------------------------------------------------------------------------------------------------------------------------------------------------------------------------------------------------------------------------------------------------------------------------------------------------------------------------------------------------------------------------------------------------------------------------------------------------------------------------------------------------------------------------------------------------------------------------------------------------------------------------------------------------------------------------------------------------------------------------------------------------------------------------------------------------------------------------------------------------------------------------------------------------------------------------------------------------------------------------------------------------------------------------------------------------------------------------------------------------------------------------------------------------------------------------------------------------------------------------------------------------------------------------------------------------------------------------------------------------------------------------------------------------------------------------------------------------------------------------------------------------------------------------------------------------------------------------------------------------------------------------------------------------------------------------------------------------------------------------------------------------------------------------|
| <b>No Francophone data</b> | <ol style="list-style-type: none"> <li>1. Antiretroviral Therapy Cohort, C., <i>Influence of geographical origin and ethnicity on mortality in patients on antiretroviral therapy in Canada, Europe, and the United States</i>. Clinical infectious diseases : an official publication of the Infectious Diseases Society of America, 2013. <b>56</b>(12): p. 1800-9.</li> <li>2. BaidooBonso, S., et al., <i>Social and proximate determinants of the frequency of condom use among African, Caribbean, and other Black people in a Canadian city: Results from the BLACCH study</i>. Journal of Immigrant and Minority Health, 2016. <b>18</b>(1): p. 67-85.</li> <li>3. BaidooBonso, S., et al., <i>HIV risk perception and distribution of HIV risk among African, Caribbean and other Black people in a Canadian city: mixed methods results from the BLACCH study</i>. BMC public health, 2013. <b>13</b>: p. 184.</li> <li>4. Blot, S., et al., <i>AIDS Service Organization Access Among African, Caribbean and Other Black Residents of an Average Canadian City</i>. J Immigr Minor Health, 2017. <b>19</b>(4): p. 851-860.</li> <li>5. Browne, O.A., <i>Assessing healthcare providers' responses to African and Caribbean families living with HIV</i>. Dissertation Abstracts International Section A: Humanities and Social Sciences, 2009. <b>69</b>(7-A): p. 2753.</li> <li>6. Burton K, A.S., Kerr J, Kershner S, Maticka-Tyndale E., <i>Examining sexual concurrency and number of partners among African, Caribbean, and black women using the social ecological model: Results from the ACBY study</i>. Canadian Journal of Human Sexuality, 2009. <b>Volume 28</b> (Issue 1): p. pp. 46-56.</li> <li>7. Csete, J., <i>'Vectors, vessels and victims': HIV/AIDS and women's human rights in Canada</i>. 'Vectors, vessels and victims': HIV/AIDS and women's human rights in Canada, 2005.</li> <li>8. dela Cruz, A.M.M., <i>A narrative inquiry into the experiences of Sub-Saharan African immigrants living with HIV in Alberta, Canada</i>. Dissertation Abstracts International: Section B: The Sciences and Engineering, 2017. <b>77</b>(9-B(E)): p. No-Specified.</li> <li>9. Gardezi, F., et al., <i>Experiences of and responses to HIV among African and Caribbean communities in Toronto, Canada</i>. AIDS care, 2008. <b>20</b>(6): p. 718-25.</li> <li>10. Kapiriri, L., et al., <i>How acceptable is it for HIV positive African, Caribbean and Black women to provide breast milk/fluid samples for research purposes?</i> BMC research notes, 2017. <b>10</b>(1): p. 7.</li> <li>11. Kapiriri, L., et al., <i>The experiences of making infant feeding choices by African, Caribbean and Black HIV-positive mothers in Ontario, Canada</i>. World health &amp; population, 2014. <b>15</b>(2): p. 14-22.</li> <li>12. Khan, S., et al., <i>Loneliness and perceived social support in pregnancy and early postpartum of mothers living with HIV in Ontario, Canada</i>. AIDS Care, 2019. <b>31</b>(3): p. 318-325.</li> <li>13. Kippax, S.C., et al., <i>Living with HIV: Recent research from France and the French Caribbean (VESPA study), Australia, Canada and the United Kingdom</i>. AIDS, 2007. <b>21</b>(Suppl 1): p. S1-S3.</li> <li>14. Krusi, A., et al. <i>Marginalized women living with HIV at increased risk of viral load suppression failure: implications for prosecutorial guidelines regarding criminalization of HIV non-disclosure in Canada and globally</i>. in <i>JOURNAL OF THE INTERNATIONAL AIDS SOCIETY</i>. 2018. JOHN WILEY &amp; SONS LTD THE ATRIUM, SOUTHERN GATE, CHICHESTER PO19 8SQ, W ....</li> <li>15. Li, A.T., et al., <i>Effects Of HIV stigma reduction interventions in diasporic communities: insights from the CHAMP study</i>. AIDS Care, 2018. <b>30</b>(6): p. 739-745.</li> <li>16. Logie, C., et al. <i>Developing and pilot testing TRANScending love, a multi-methods arts based workshop with African, Caribbean and Black transgender women</i>. in <i>JOURNAL OF</i></li> </ol> |

|  |                                                                                                                                                                                                                                                                                                                                                                                                                                                                                                                                                                                                                                                                                                                                                                                                                                                                                                                                                                                                                                                                                                                                                                                                                                                                                                                                                                                                                                                                                                                                                                                                                                                                                                                                                                                                                                                                                                                                                                                                                                                                                                                                                                                                                                                                                                                                                                                                                                                                                                                                                                                                                                                                                                                                                                                                                                                                                                                                                                                                                                                                                                                                                                                                                                                                                                                                                                                                                                                                                                                                                                                                                                                                                                                                                                                                                                                                                                                                                                                                                                                                                                                                                                                         |
|--|-----------------------------------------------------------------------------------------------------------------------------------------------------------------------------------------------------------------------------------------------------------------------------------------------------------------------------------------------------------------------------------------------------------------------------------------------------------------------------------------------------------------------------------------------------------------------------------------------------------------------------------------------------------------------------------------------------------------------------------------------------------------------------------------------------------------------------------------------------------------------------------------------------------------------------------------------------------------------------------------------------------------------------------------------------------------------------------------------------------------------------------------------------------------------------------------------------------------------------------------------------------------------------------------------------------------------------------------------------------------------------------------------------------------------------------------------------------------------------------------------------------------------------------------------------------------------------------------------------------------------------------------------------------------------------------------------------------------------------------------------------------------------------------------------------------------------------------------------------------------------------------------------------------------------------------------------------------------------------------------------------------------------------------------------------------------------------------------------------------------------------------------------------------------------------------------------------------------------------------------------------------------------------------------------------------------------------------------------------------------------------------------------------------------------------------------------------------------------------------------------------------------------------------------------------------------------------------------------------------------------------------------------------------------------------------------------------------------------------------------------------------------------------------------------------------------------------------------------------------------------------------------------------------------------------------------------------------------------------------------------------------------------------------------------------------------------------------------------------------------------------------------------------------------------------------------------------------------------------------------------------------------------------------------------------------------------------------------------------------------------------------------------------------------------------------------------------------------------------------------------------------------------------------------------------------------------------------------------------------------------------------------------------------------------------------------------------------------------------------------------------------------------------------------------------------------------------------------------------------------------------------------------------------------------------------------------------------------------------------------------------------------------------------------------------------------------------------------------------------------------------------------------------------------------------------------|
|  | <p><i>THE INTERNATIONAL AIDS SOCIETY</i>. 2018. JOHN WILEY &amp; SONS LTD THE ATRIUM, SOUTHERN GATE, CHICHESTER PO19 8SQ, W ....</p> <ol style="list-style-type: none"> <li>17. Logie, C.H., et al., <i>Prevalence and Correlates of Forced Sex as a Self-Reported Mode of HIV Acquisition Among a Cohort of Women Living With HIV in Canada</i>. Journal of interpersonal violence, 2017: p. 886260517718832.</li> <li>18. Logie, C.H., et al., <i>Engagement in and continuity of HIV care among African and Caribbean Black women living with HIV in Ontario, Canada</i>. International journal of STD &amp; AIDS, 2017. <b>28</b>(10): p. 969-974.</li> <li>19. Logie, C.H., et al., <i>"It's for US-newcomers, LGBTQ persons and HIV-positive persons. You feel free to be": Social support groups as an HIV prevention strategy with LGBTQ African, Caribbean and black newcomers and refugees in Toronto, Canada</i>. Canadian Journal of Infectious Diseases and Medical Microbiology, 2015. <b>26</b>(SUPPL. SB): p. 24B.</li> <li>20. Logie, C.H., et al., <i>Adapting and pilot testing the Healthy Love HIV and sexually transmitted infection prevention intervention with African, Caribbean and Black women in community-based settings in Toronto, Canada</i>. International journal of STD &amp; AIDS, 2018. <b>29</b>(8): p. 751-759.</li> <li>21. Logie, C.H., et al., <i>Adapting and pilot testing the Healthy Love HIV and sexually transmitted infection prevention intervention with African, Caribbean and Black women in community-based settings in Toronto, Canada</i>. Int J STD AIDS, 2018. <b>29</b>(8): p. 751-759.</li> <li>22. Loutfy, M., et al., <i>Cohort profile: the Canadian HIV Women's Sexual and Reproductive Health Cohort Study (CHIWOS)</i>. PLoS ONE, 2017. <b>12</b>(9): p. e0184708.</li> <li>23. Masindi, K.I., et al., <i>Co-morbid Non-communicable Diseases and Associated Health Service Use in African and Caribbean Immigrants with HIV</i>. J Immigr Minor Health, 2018. <b>20</b>(3): p. 536-545.</li> <li>24. Nakyonyi, M.M., <i>HIV/AIDS education participation by the African community</i>. Canadian journal of public health = Revue canadienne de sante publique, 1993. <b>84 Suppl 1</b>: p. S19-23.</li> <li>25. Nelson, L.E., et al., <i>A recipe for increasing racial and gender disparities in HIV infection: A critical analysis of the Canadian guideline on pre-exposure prophylaxis and non-occupational post-exposure prophylaxis' responsiveness to the HIV epidemics among women and Black communities</i>. The Canadian Journal of Human Sexuality, 2019. <b>28</b>(1): p. 1-4.</li> <li>26. Tulloch, H.E., et al., <i>HIV knowledge among Canadian-born and sub-Saharan African-born patients living with HIV</i>. Special focus on communicable diseases, 2012. <b>14</b>(1): p. 132-139.</li> <li>27. Umamaheswaran-Mahara, M. and A.J. Hunter, <i>Health status of a paediatric urban refugee and immigrant population in Canada</i>. Paediatrics and Child Health, 2010. <b>15</b>(SA): p. 48A.</li> <li>28. Webster, K., et al., <i>Strategies for Recruiting Women Living with Human Immunodeficiency Virus in Community-Based Research: Lessons from Canada</i>. Progress in community health partnerships : research, education, and action, 2018. <b>12</b>(1): p. 21-34.</li> <li>29. Williams, C.C., et al., <i>HIV prevention risks for Black women in Canada</i>. Social science &amp; medicine (1982), 2009. <b>68</b>(1): p. 12-20.</li> <li>30. Worthington, C., et al., <i>African immigrant views of HIV service needs: gendered perspectives</i>. AIDS Care, 2013. <b>25</b>(1): p. 103-108.</li> <li>31. Worthington, C.A., et al., <i>Individual and jurisdictional factors associated with voluntary HIV testing in Canada: Results of a national survey, 2011</i>. Canadian journal of public health = Revue canadienne de sante publique, 2014. <b>106</b>(2): p. e4-9.</li> <li>32. Zhabokritsky, A., et al., <i>Barriers to HIV pre-exposure prophylaxis among African, Caribbean and Black men in Toronto, Canada</i>. PloS one, 2019. <b>14</b>(3): p. e0213740.</li> </ol> |
|--|-----------------------------------------------------------------------------------------------------------------------------------------------------------------------------------------------------------------------------------------------------------------------------------------------------------------------------------------------------------------------------------------------------------------------------------------------------------------------------------------------------------------------------------------------------------------------------------------------------------------------------------------------------------------------------------------------------------------------------------------------------------------------------------------------------------------------------------------------------------------------------------------------------------------------------------------------------------------------------------------------------------------------------------------------------------------------------------------------------------------------------------------------------------------------------------------------------------------------------------------------------------------------------------------------------------------------------------------------------------------------------------------------------------------------------------------------------------------------------------------------------------------------------------------------------------------------------------------------------------------------------------------------------------------------------------------------------------------------------------------------------------------------------------------------------------------------------------------------------------------------------------------------------------------------------------------------------------------------------------------------------------------------------------------------------------------------------------------------------------------------------------------------------------------------------------------------------------------------------------------------------------------------------------------------------------------------------------------------------------------------------------------------------------------------------------------------------------------------------------------------------------------------------------------------------------------------------------------------------------------------------------------------------------------------------------------------------------------------------------------------------------------------------------------------------------------------------------------------------------------------------------------------------------------------------------------------------------------------------------------------------------------------------------------------------------------------------------------------------------------------------------------------------------------------------------------------------------------------------------------------------------------------------------------------------------------------------------------------------------------------------------------------------------------------------------------------------------------------------------------------------------------------------------------------------------------------------------------------------------------------------------------------------------------------------------------------------------------------------------------------------------------------------------------------------------------------------------------------------------------------------------------------------------------------------------------------------------------------------------------------------------------------------------------------------------------------------------------------------------------------------------------------------------------------------------------|

|                                           |                                                                                                                                                                                                                                                                                                                                                                                                                                                                                                                                                                                                                                                                                                                                                                                                                                                                                                                                                                                    |
|-------------------------------------------|------------------------------------------------------------------------------------------------------------------------------------------------------------------------------------------------------------------------------------------------------------------------------------------------------------------------------------------------------------------------------------------------------------------------------------------------------------------------------------------------------------------------------------------------------------------------------------------------------------------------------------------------------------------------------------------------------------------------------------------------------------------------------------------------------------------------------------------------------------------------------------------------------------------------------------------------------------------------------------|
| <b>Review with no eligible studies</b>    | <ol style="list-style-type: none"> <li>1. Aidala, A.A., et al., <i>Housing Status, Medical Care, and Health Outcomes Among People Living With HIV/AIDS: A Systematic Review</i>. American journal of public health, 2016. <b>106</b>(1): p. e1-e23.</li> <li>2. Ha, S., et al., <i>A systematic review of HIV testing among Canadian populations</i>. Canadian journal of public health = Revue canadienne de sante publique, 2014. <b>105</b>(1): p. e53-62.</li> <li>3. Jbilou, J., et al., <i>Men-centered approaches for primary and secondary prevention of HIV/AIDS: a scoping review of effective interventions</i>. Journal of AIDS and Clinical Research, 2013. <b>4</b>(11): p. 257.</li> <li>4. Mbuagbaw, L., et al., <i>Strategies to improve adherence to antiretroviral therapy and retention in care for people living with HIV in high-income countries: a protocol for an overview of systematic reviews</i>. BMJ open, 2018. <b>8</b>(9): p. e022982.</li> </ol> |
| <b>Not HIV</b>                            | <ol style="list-style-type: none"> <li>1. Bernier, A.M., et al., <i>A survey on health care access in French for francophone immigrants in Winnipeg, Canada</i>. Articles from the 13th World Congress on Public Health. 2013. 65-68.</li> <li>2. Pottie, K., et al., <i>Language proficiency, gender and self-reported health: an analysis of the first two waves of the longitudinal survey of immigrants to Canada</i>. Can J Public Health, 2008. <b>99</b>(6): p. 505-10.</li> </ol>                                                                                                                                                                                                                                                                                                                                                                                                                                                                                          |
| <b>Study not in Canada</b>                | <ol style="list-style-type: none"> <li>1. Smith, M.L., S. Read, and A. Bitnun, <i>Neurocognitive development in young HIV-Exposed uninfected children exposed pre-or perinatally to antiretroviral medications</i>. Canadian Journal of Infectious Diseases and Medical Microbiology, 2014. <b>25</b>(SUPPL. SA): p. 65A.</li> </ol>                                                                                                                                                                                                                                                                                                                                                                                                                                                                                                                                                                                                                                               |
| <b>Not a study</b>                        | <ol style="list-style-type: none"> <li>1. Anonymous, <i>HIV-positive man from DRC deemed a "person in need of protection"</i>. HIV/AIDS policy &amp; law review, 2008. <b>13</b>(2-3): p. 30.</li> </ol>                                                                                                                                                                                                                                                                                                                                                                                                                                                                                                                                                                                                                                                                                                                                                                           |
| <b>Study not about access to HIV care</b> | <ol style="list-style-type: none"> <li>1. Kaida, A., et al., <i>Hiring, training, and supporting Peer Research Associates: Operationalizing community-based research principles within epidemiological studies by, with, and for women living with HIV</i>. Harm Reduct J, 2019. <b>16</b>(1): p. 47.</li> </ol>                                                                                                                                                                                                                                                                                                                                                                                                                                                                                                                                                                                                                                                                   |
